# Supplementary material for: Structural Consequence of Non-Synonymous Single-Nucleotide Variants in the N-Terminal Domain of LIS1
Source: MDPI journal article supplement (doi:10.3390/ijms23063109), 2022-03-14
Supplement: s1 [file s1]

## Supplementary File 2

**Table S1.** The prediction cut-off used for the identification of deleterious SNPs in *LIS1* gene.

| SL.NO | Name of Tool     | Prediction Method      | Cut-off Value |
|-------|------------------|------------------------|---------------|
| 1     | SIFT             | Sequence               | $\leq 0.05$   |
| 2     | Polyphen         | Sequence and structure | $> 0.9$       |
| 3     | Condel           | Sequence               | $> 0.5$       |
| 4     | CADD             | Sequence               | $> 20$        |
| 5     | DANN             | Sequence               | $> 0.5$       |
| 6     | FATHMM           | Sequence and structure | $< -3.0$      |
| 7     | M-CAP            | Sequence               | $> 0.025$     |
| 8     | MetaLR           | Sequence               | $> 0.5$       |
| 9     | MutPred          | Sequence and structure | $> 0.75$      |
| 10    | MutationAssessor | Sequence and structure | $> 2$         |
| 11    | PROVEAN          | Sequence               | $\leq -2.5$   |
| 12    | VEST3            | Sequence               | $< 0.05$      |
| 13    | fathmm-MKL       | Sequence               | $> 0.5$       |
| 14    | I-mutant3.0      | Sequence and structure | $< -0.5$      |
| 15    | iStable          | Sequence and Structure | Decrease      |
| 16    | MuPro            | Sequence               | $< 0.0$       |
| 17    | PhD-SNP          | Sequence               | $> 0.5$       |
| 18    | PANTHER          | Sequence               | $< -3$        |
| 19    | SNPs and Go      | Sequence and Structure | $> 0.5$       |
| 20    | SNAP2            | Sequence and structure | $> 5$         |

**Table S2.** Cumulative deleterious nsSNPs prediction in *LIS1* gene.

| rs ID       | Substitution | SIFT | PolyPhen | Con del | CADD | DANN  | FATHMM | M-CAP | MetaLR | MutPred | MutationAssessor | PROVEAN | VEST3 | fathmm-MKL | I-mutant | iStable  | MuPro | PhD_SNP | PANTHER | SNPs and Go | SNAP2 |
|-------------|--------------|------|----------|---------|------|-------|--------|-------|--------|---------|------------------|---------|-------|------------|----------|----------|-------|---------|---------|-------------|-------|
| rs121434486 | F31S         | 0    | 0.979    | 0.867   | 29   | 0.998 | -2.56  | 0.384 | 0.793  | 0.869   | 2.97             | -5.48   | 0.936 | 0.976      | -1.96    | Decrease | -2.28 | 0.742   | 0.678   | 0.725       | 85    |
| rs587784254 | W55R         | 0    | 0.961    | 0.849   | 29.7 | 0.996 | -3.57  | 0.432 | 0.928  | 0.635   | 3.86             | -13.64  | 0.795 | 0.982      | -0.87    | Decrease | -1.01 | 0.826   | 0.86    | 0.763       | 80    |
| rs587784261 | V124D        | 0    | 0.956    | 0.844   | 29.2 | 0.985 | -0.05  | 0.237 | 0.510  | 0.887   | 2.98             | -5.13   | 0.991 | 0.985      | -1.53    | Decrease | -1.65 | 0.862   | 0.662   | 0.699       | 78    |
| rs587784276 | W219C        | 0    | 1        | 0.945   | 33   | 0.994 | -1.73  | 0.524 | 0.797  | 0.88    | 3.74             | -12.41  | 0.977 | 0.998      | -1.5     | Decrease | -0.46 | 0.96    | 0.959   | 0.698       | 64    |
| rs121434485 | D317H        | 0    | 1        | 0.945   | 32   | 0.996 | -2.51  | 0.461 | 0.891  | 0.956   | 3.55             | -6.7    | 0.958 | 0.994      | -0.99    | Decrease | -1.69 | 0.922   | 0.841   | 0.638       | 98    |
| rs757993270 | W55L         | 0    | 0.949    | 0.838   | 32   | 0.986 | -3.54  | 0.462 | 0.934  | 0.68    | 3.86             | -12.62  | 0.615 | 0.990      | -0.74    | Decrease | -0.05 | 0.72    | 0.745   | 0.654       | 72    |
| rs980416636 | G350V        | 0    | 0.998    | 0.919   | 31   | 0.998 | -0.21  | 0.182 | 0.595  | 0.76    | 2.66             | -8.9    | 0.965 | 0.993      | -0.67    | Decrease | -1.70 | 0.943   | 0.858   | 0.858       | 64    |

The bold value in each tool indicate the respective SNP is deleterious, which satisfied the following criterion, SIFT ( $\leq 0.05$ ), polyphen ( $> 0.9$ ), Condel ( $> 0.5$ ), CADD ( $> 20$ ), DANN\_score ( $> 0.5$ ), FATHMM ( $< -3.0$ ), M-CAP ( $> 0.025$ ), MetaLR\_score ( $> 0.5$ ), MutPred ( $> 0.75$ ), MutationAssessor ( $> 2$ ), PROVEAN ( $\leq -2.5$ ), VEST3 ( $< 0.05$ ), fathmm-MKL ( $> 0.5$ ), I-mutant3.0 ( $< -0.5$ ), iStable ( $> 0.7$ ), MuPro ( $< 0.0$ ), PhD-SNP ( $< 0.5$ ), PANTHER ( $< -3$ ), SNPs and Go ( $> 0.5$ ), SNAP-2 ( $> 5$ ).

**Table S3.** The cosine content was analyzed for the first four principal components of individual sub-trajectories.

| System | PC1    | PC2    | PC3     | PC4     |
|--------|--------|--------|---------|---------|
| Wild   | 0.0006 | 0.4417 | 0.00145 | 0.01464 |
| F31S   | 0.2776 | 0.1513 | 0.0013  | 0.04474 |
| W55L   | 0.4261 | 0.3766 | 0.0369  | 0.16474 |
| W55R   | 0.3244 | 0.2047 | 0.0271  | 0.0308  |

**Table S4.** Total MM-GBSA binding energy ( $\Delta G_{\text{bind}}$ ) of LIS1 dimer.

| System | kcal/mol |
|--------|----------|
| Wild   | -158.12  |
| F31S   | -120.5   |
| W55L   | -119.37  |
| W55R   | -119.45  |

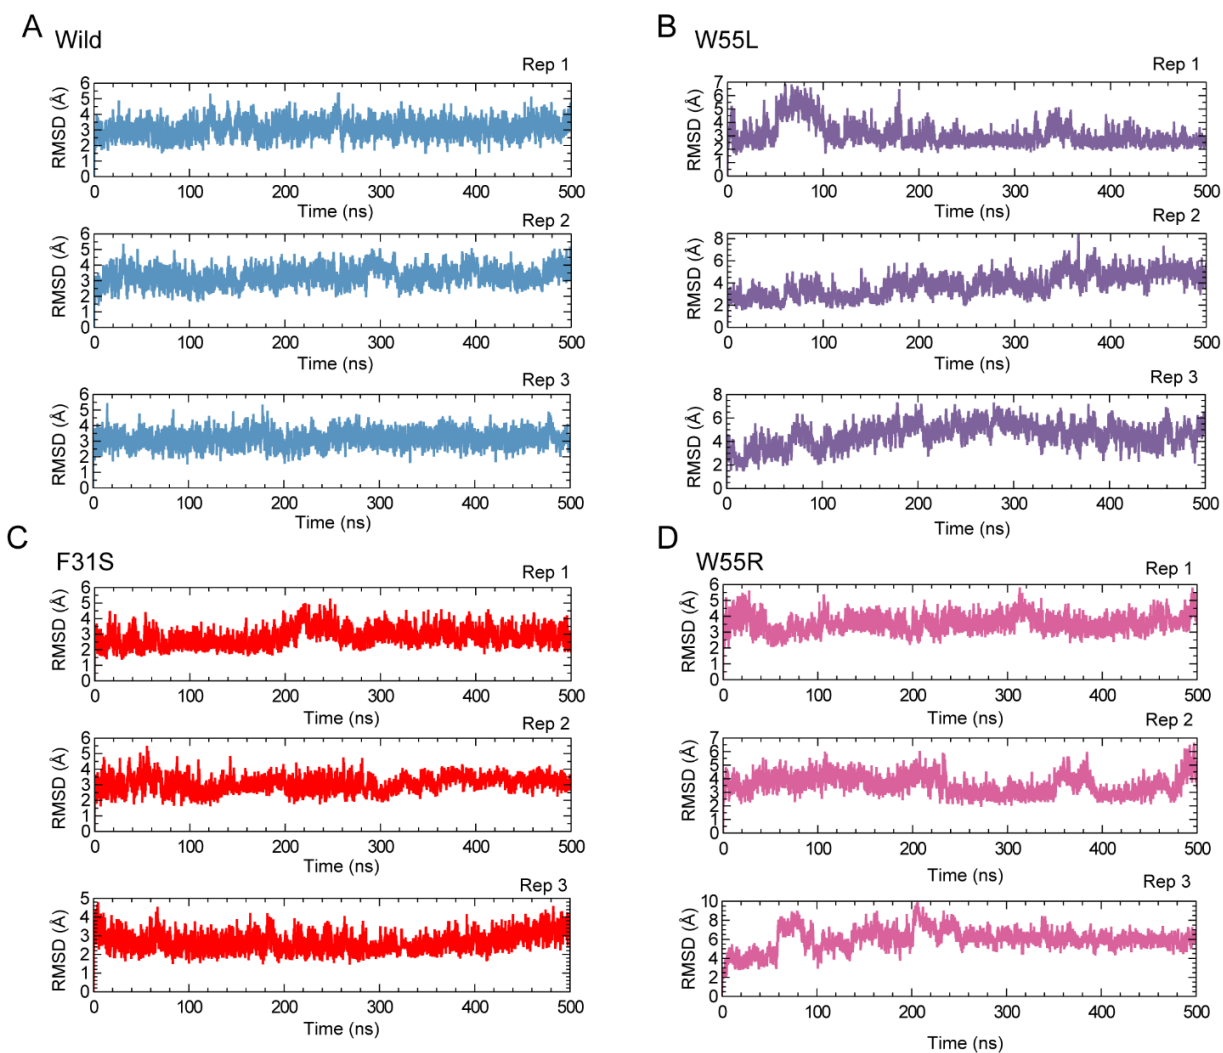

**Figure S1.** RMSD values generated from each run of the particular system for wild and variant-containing structures were estimated using protein C-alpha of (A) wild, (B) W55L, (C) F31S, and (D) W55R, respectively.

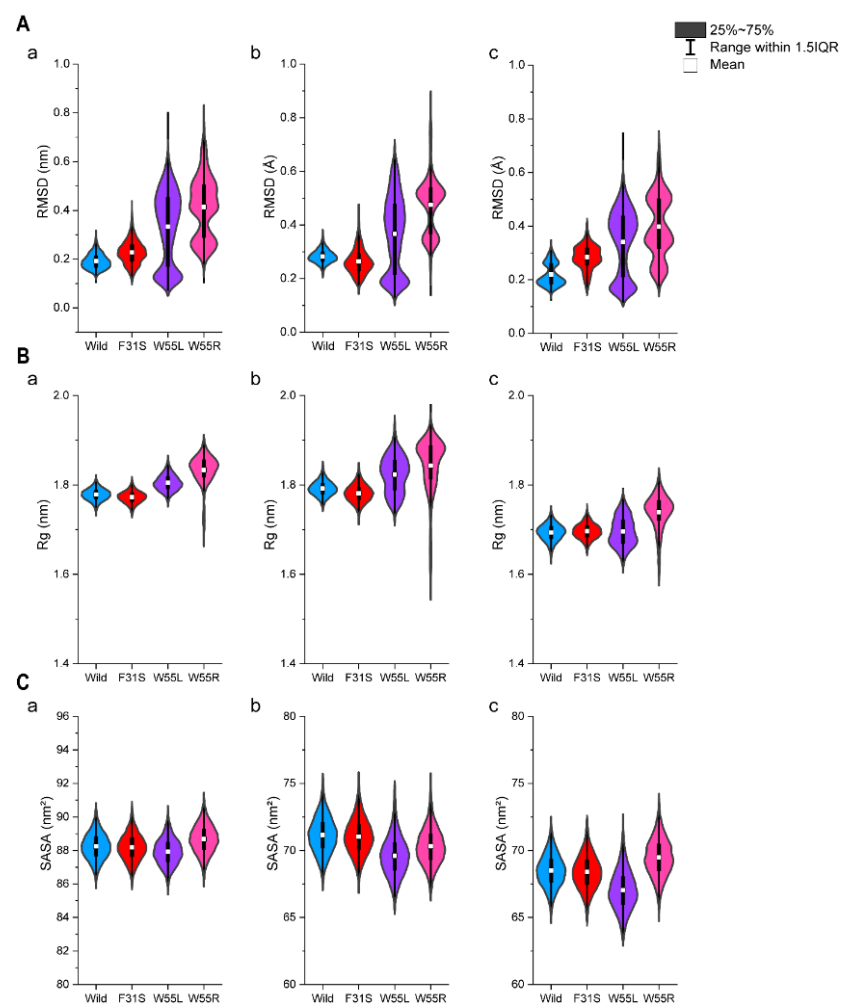

**Figure S2.** Analysis of conformational stabilities during the simulation. The graphical illustration represents the average difference in the conformational changes between wild and variant-containing structures through RMSD (A), Rg (B), and SASA (C) analyses. In all cases, (a) represents the average difference in dimers, (b) monomer A and (c) monomer B, respectively.

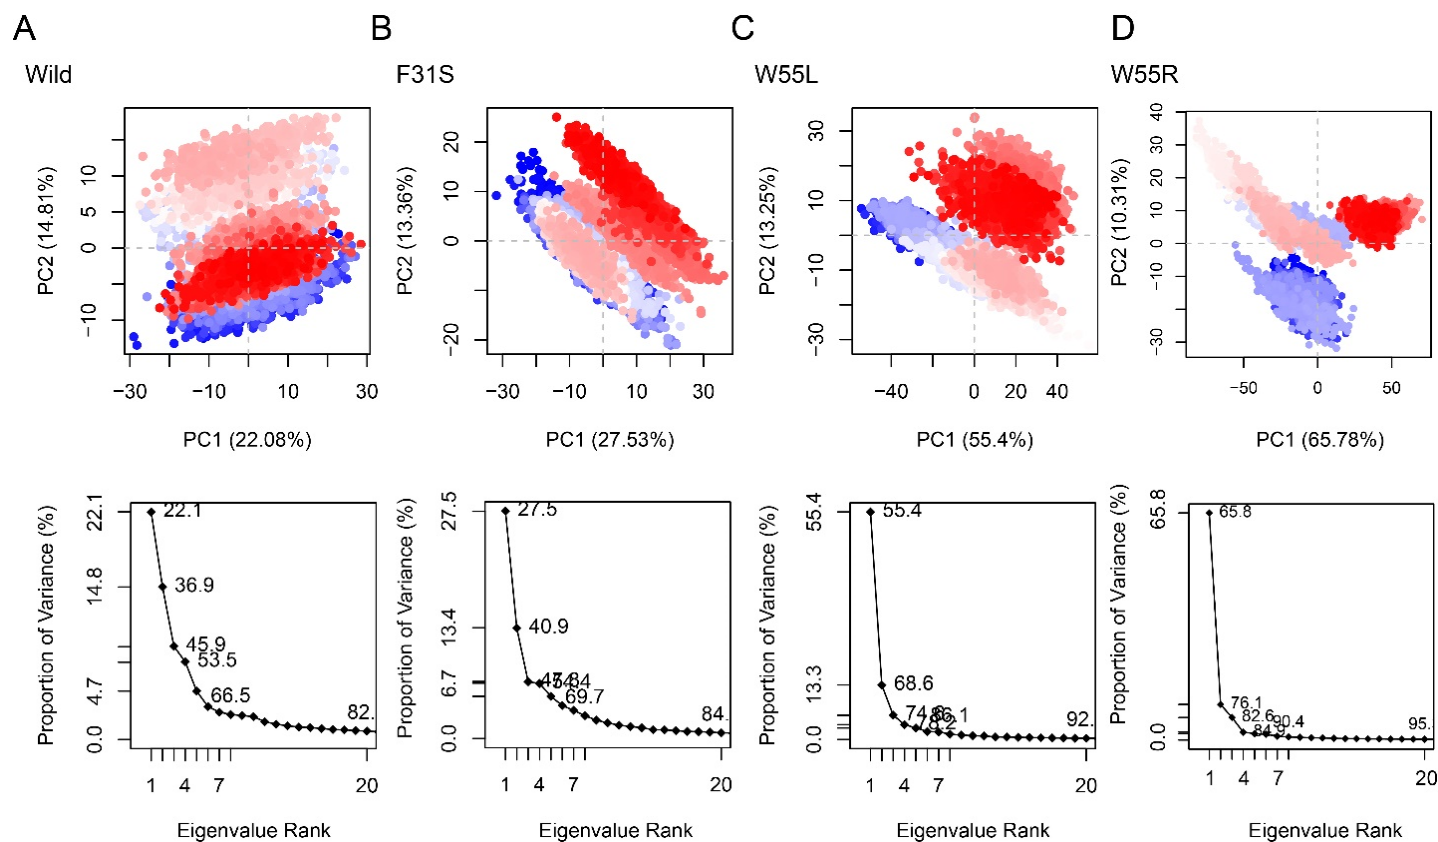

**Figure S3.** The distribution of trajectory conformers was projected onto principal planes of components 1 and 2, where each dot represents the structure, which was colored by time evolution (From blue to red). The lower plane shows the proportion of variance for all principal components. Here, (A) wild, (B) F31S, (C) W55L, and (D) W55R.

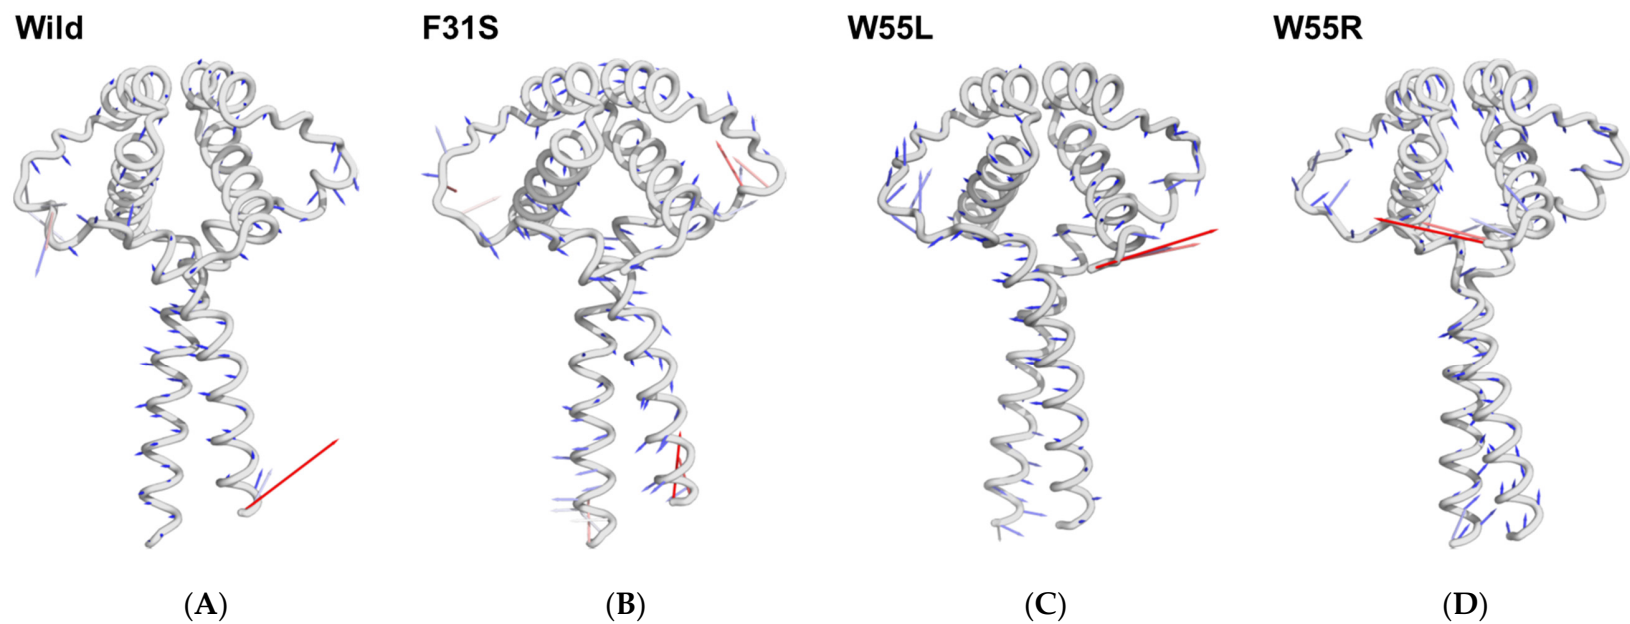

**Figure S4.** Porcupine plots were used to show the contributing motions in the PC2 for (A) wild, (B) F31S, (C) W55L, and (D) W55R, respectively.



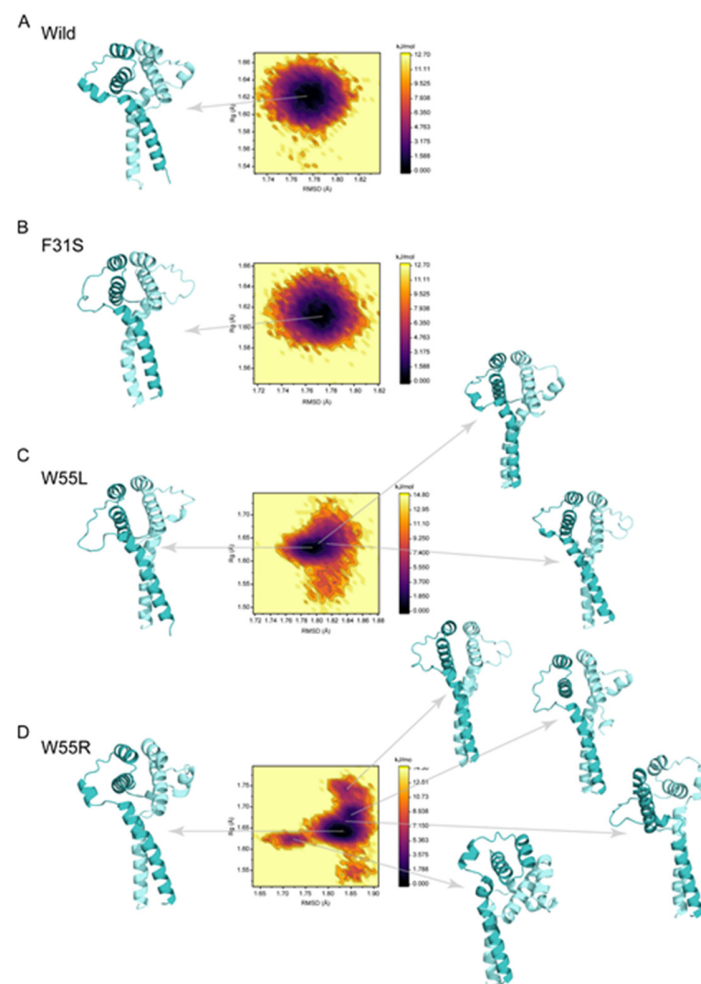

**Figure S5.** Cartoon representations of the stable and metastable state for the wild and variants, based on the free energy landscape (FEL). Here, A) wild, B) F31S, C) W55L, and D) W55R, which show how variants change the protein conformation. The left side of the figure shows the stable conformer, while the right side represents the metastable state.

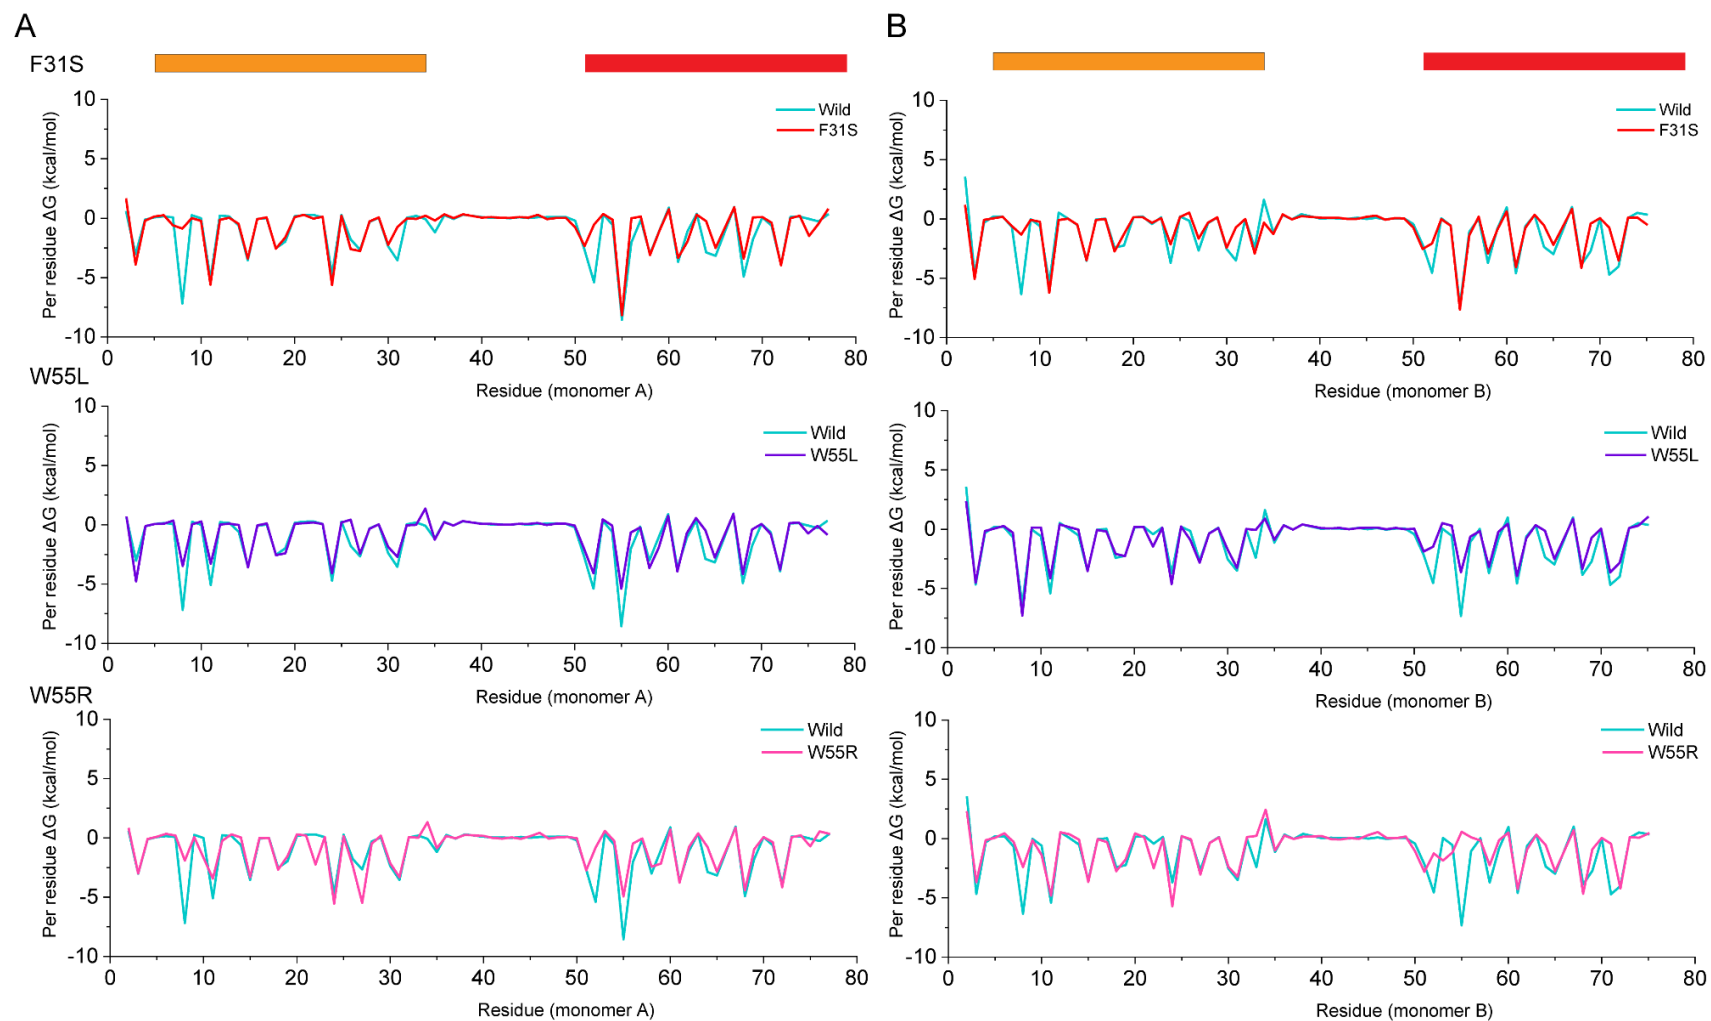

**Figure S6.** Per-residue decomposition analysis shows the binding contribution by each monomer in LIS1 dimer in the presence of variants, which were compared to wild-type. Here, **(A)** monomer A, while **(B)** monomer B.

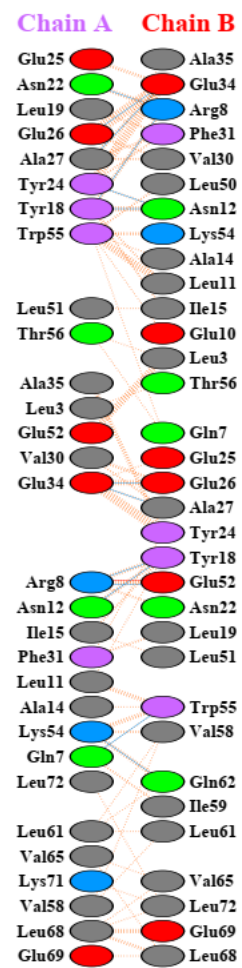

**Figure S7.** Inter monomeric interaction in the wild-type LIS1 dimer, revealed by PDBsum using PDB, 1UUJ.
