# Supplementary material for: Structural Consequence of Non-Synonymous Single-Nucleotide Variants in the N-Terminal Domain of LIS1
Source: Int J Mol Sci. 2022 Mar 14;23(6):3109. doi: 10.3390/ijms23063109 (PMC8955593; doi:10.3390/ijms23063109)
Supplement: Supplementary file 1 [file ijms-23-03109-s001.zip › Supplimentary File 1.xlsx]

## Sheet: Sheet1
rs ID	Protein_position	Amino_acids	SIFT	PolyPhen	Condel	CADD	DANN	FATHMM	M-CAP	MetaLR	MutPred	MutationAssessor	PROVEAN	VEST3	fathmm-MKL	I-mutant	iStable	MuPro	PhD_SNP	PANTHER	SNPs and Go	SNAP2
rs587784265	1	M/I	0.02	0.907	0.744	27.7	0.97634	-2.34	0.576167	0.3224	0.889	-	-2.83	0.985	0.95213	-0.48	Decrease	-0.752171	0.138		0.109	-82
rs587784262	13	R/G	0.03	0.003	0.364	23.4	0.989651	-1.21	0.0602002	0.3618	0.521	1.28	3.17	0.721	0.9827	-1.42	Decrease	-1.31041	0.489	0.265	0.208	-18
rs374766360	13	R/Q	0.13	0.003	0.253	23.3	0.997596	-1.12	0.0477282	0.2703	-	-0.15	-1.27	0.287	0.98281	-1.11	Decrease	-0.706822	0.317	0.197	0.128	-58
rs587784272	19	L/R	0	0.996	0.906	26.8	0.997534	-3.71	0.672151	0.9198	0.829	3.48	-5.43	0.691	0.97523	-1.78	Decrease	-1.98893				39
rs975702095	20	R/S	1	0.029	0.002	22.7	0.904964	-1.08	0.0352681	0.215	0.513	-0.67	-0.18	0.704	0.98273	-1.41	Decrease	-0.90628	0.175	0.1	0.069	-86
rs975702095	20	R/G	0.5	0.007	0.01	22.8	0.94977	-1.09	0.0387315	0.2504	0.533	-0.42	-1.66	0.761	0.98379	-1.52	Decrease	-1.35054	0.357	0.162	0.085	-29
rs121434486	31	F/S	0	0.979	0.867	29	0.998907	-2.56	0.384089	0.7935	0.869	2.97	-5.48	0.936	0.97622	-1.96	Decrease	-2.28613	0.742	0.678	0.725	85
rs767670214	38	D/N	0.19	0.001	0.05	22.2	0.997634	-1.58	0.0392877	0.423	0.397	0.895	-1.37	0.066	0.97136	-0.86	Decrease	-0.846516	0.256	0.119	0.053	-71
rs767670214	38	D/Y	0	0.646	0.671	24.7	0.995254	-1.59	0.146076	0.6189	0.433	0.895	-3.14	0.64	0.97369	-0.26	Decrease	-0.83375	0.579	0.538	0.307	17
rs587784250	41	E/K	0.56	0	0.006	21.1	0.970791	-1.7	0.0571115	0.3129	0.43	0.46	-0.79	0.706	0.98894	-0.63	Increase	-1.31049	0.376	0.186	0.123	-5
rs587784250	12	M/I		0		21.1	0.970791	-1.7	0.0571115	0.3129	0.43	0.46	-0.79	0.706	0.98894		Increase
rs587784254	55	W/R	0	0.961	0.849	29.7	0.996261	-3.57	0.432929	0.9287	0.635	3.865	-13.64	0.795	0.98223	-0.87	Decrease	-1.01051	0.826	0.86	0.763	80
rs587784257	64	K/N	0	0.952	0.84	28.6	0.998509	-2.04	-	0.8145	0.352	3.42	-4.81	0.142	0.99165	-0.36	Decrease	-0.582627	0.545	0.686	0.575	34
rs886041341	113	R/G	0.17	0.482	0.219	24.6	0.993818	0.29	0.0296775	0.1039	0.596	-0.285	-4.49	0.863	0.94042	-1.61	Decrease	-1.13216	0.285	0.364	0.115	-27
rs797045860	117	H/R	0	1	0.945	25.5	0.997315	0.1	0.0721638	0.3318	0.721	2.055	-7.8	0.921	0.99016	-0.13	Increase	-0.714034	0.689	0.745	0.734	83
rs587784261	124	V/D	0	0.956	0.844	29.2	0.985535	-0.05	0.237003	0.5106	0.887	2.98	-5.13	0.991	0.9859	-1.53	Decrease	-1.65178	0.862	0.662	0.699	78
rs587784263	129	D/V	0	1	0.945	27.7	0.994298	-2.51	0.587979	0.8961	0.871	4.515	-8.95	0.978	0.9902	-0.02	Decrease	-0.528264	0.956	0.914	0.807	90
rs121434482	149	H/R	0	1	0.945	25.9	0.998031	-1.46	0.132939	0.8057	0.96	3.825	-7.97	0.985	0.99108	-0.26	Increase	-0.88368	0.901	0.72	0.658	97
rs116237011	158	F/L	0.03	0.972	0.778	26.9	0.998029	-0.25	0.0961505	0.379	0.73	1.2	-5.31	0.931	0.91587	-1.26	Decrease	-1.14787	0.712	0.333	0.264	46
rs121434487	162	G/S	0.02	1	0.883	34	0.998804	-1.75	0.178422	0.7073	0.899	1	-5.97	0.925	0.99323	-1.23	Decrease	-0.836886	0.693	0.224	0.246	90
rs200390886	168	C/Y	0	0.996	0.906	29.3	0.998	0.12	0.0833752	0.4583	0.768	3.135	-10.29	0.968	0.99323	-0.11	0.849067	-1.13612				84
rs200390886	168	C/S	0.05	0.408	0.477	24.6	0.994685	0.31	0.027312	0.1879	-	0.23	-8.96	0.658	0.99457	-0.6	0.696755	-1.62886	0.483	0.704	0.576	-10
rs121434484	169	S/P	0	0.999	0.935	28.2	0.998194	-0.86	0.334323	0.7485	0.938	3.94	-4.98	0.949	0.98623	-0.06	Increase	-1.09872				97
rs121434484	1	S/P	0	1	0.945	28.2	0.998194	-0.86	0.334323	0.7485	0.938	3.94	-4.98	0.949	0.98623		Decrease
rs781710874	206	H/Q	0.33	0.011	0.025	14.77	0.882311	0.21	0.0523978	0.1025	0.422	-0.355	-3.52	0.848	0.97021	-0.77	Decrease	-0.750451	0.297	0.119	0.05	-43
rs781710874	38	H/Q	0.31	0.03	0.029	14.77	0.882311	0.21	0.0523978	0.1025	0.422	-0.355	-3.52	0.848	0.97021		Decrease
rs587784276	219	W/C	0	1	0.945	33	0.994282	-1.73	0.524224	0.7973	0.88	3.74	-12.41	0.977	0.99832	-1.5	Decrease	-0.468566	0.96	0.959	0.698	64
rs587784276	51	W/C	0	0.998	0.919	33	0.994282	-1.73	0.524224	0.7973	0.88	3.74	-12.41	0.977	0.99832		Decrease
rs587784281	224	G/D	0	1	0.945	28.3	0.998681	-1.79	-	0.7574	0.605	3.015	-6.31	0.852	0.99789	-0.9	Decrease	-0.582677	0.89	0.886	0.634	36
rs587784281	56	G/D	0	0.689	0.691	28.3	0.998681	-1.79	-	0.7574	0.605	3.015	-6.31	0.852	0.99789		Decrease
rs121434488	241	R/Q	0.3	0.062	0.033	23.6	0.999386	0.15	0.0319043	0.1134	0.734	0.5	-2.07	0.885	0.98973	-1	Decrease	-0.660954	0.402	0.366	0.191	-48
rs121434488	241	R/P	0.2	0.879	0.392	26.6	0.997119	0.1	0.0506734	0.3254	0.884	2.355	-4.3	0.982	0.99201	-0.78	Decrease	-0.890101	0.874	0.522	0.693	93
rs121434488	73	R/Q	0.35	0.098	0.028	23.6	0.999386	0.15	0.0319043	0.1134	0.734	0.5	-2.07	0.885	0.98973		Decrease					-42
rs121434488	73	R/P	0.22	0.894	0.394	26.6	0.997119	0.1	0.0506734	0.3254	0.884	2.355	-4.3	0.982	0.99201		Increase					6
rs587784287	251	S/R	0	0.996	0.906	28.6	0.998432	-0.67	0.169992	0.69	0.774	4.35	-4.9	0.978	0.9914	-0.18	Increase	-0.953281				62
rs587784287	83	S/R	0	0.997	0.911	28.6	0.998432	-0.67	0.169992	0.69	0.774	4.35	-4.9	0.978	0.9914		Decrease
rs769280736	265	T/I	0.01	0.084	0.412	24.7	0.998862	-1.7	0.0752318	0.5958	0.49	2.23	-3.97	0.533	0.97979	-0.17	Decrease	-0.739015	0.52	0.376	0.079	48
rs769280736	97	T/I	0	0.283	0.531	24.7	0.998862	-1.7	0.0752318	0.5958	0.49	2.23	-3.97	0.533	0.97979		Decrease
rs794729199	273	R/Q	0.14	0.945	0.639	27.7	0.999444	0.17	0.0331904	0.2688	0.361	0.515	-3.61	0.73	0.9926	-0.62	Decrease	-0.423176	0.221	0.189	0.05	-42
rs794729199	105	R/Q	0.11	0.929	0.647	27.7	0.999444	0.17	0.0331904	0.2688	0.361	0.515	-3.61	0.73	0.9926		Decrease
rs121434490	277	H/P	0	0.996	0.906	27.1	0.984981	0.15	0.098955	0.3921	0.805	2.01	-8.84	0.976	0.99251	0.63	Decrease	-1.14329	0.629	0.659	0.593	94
rs121434490	109	H/P	0	0.998	0.919	27.1	0.984981	0.15	0.098955	0.3921	0.805	2.01	-8.84	0.976	0.99251		Increase
rs587784288	281	C/R	0	0.998	0.919	28	0.996957	-0.17	0.101262	0.4239	0.763	1.825	-8.52	0.967	0.9867	-0.26	Decrease	-1.17932	0.531	0.873	0.648	78
rs587784288	113	C/R	0	0.958	0.846	28	0.996957	-0.17	0.101262	0.4239	0.763	1.825	-8.52	0.967	0.9867		Decrease
rs587784291	300	E/D	0.49	0	0.011	18.49	0.992959	-1.46	-	0.2072	0.307	-0.65	0.18	0.675	0.99466	-0.36	Decrease	-0.522338	0.073	0.151	0.023	-74
rs587784291	132	E/D	0.19	0.023	0.051	18.49	0.992959	-1.46	-	0.2072	0.307	-0.65	0.18	0.675	0.99466		Decrease
rs587784293	313	S/F	0	0.999	0.935	34	0.998284	-0.68	0.280073	0.6772	0.739	3.74	-4.99	0.959	0.98663	-0.01	Decrease	-0.0421558	0.835	0.719	0.422	66
rs121434485	317	D/H	0	1	0.945	32	0.996007	-2.51	0.461428	0.891	0.956	3.555	-6.7	0.958	0.9942	-0.99	Decrease	-1.69935	0.922	0.841	0.638	98
rs144659773	320	I/V	0.13	0.072	0.258	17.49	0.994148	0.05	0.0136816	0.1479	-	0.52	-0.88	0.221	0.98765	-0.8	Decrease	-0.875393	0.188	0.291	0.133	-83
rs587784294	322	M/R	0	0.777	0.734	28.4	0.985781	0.19	0.0825867	0.2193	0.777	1.08	-3.74	0.941	0.98807		Decrease		0.74	0.484	0.495	52
rs587784236	337	H/D	0	0.984	0.875	29.7	0.992661	-1.47	0.216536	0.6971	0.774	2.635	-8.91	0.965	0.99041	-0.08	Increase	-1.22259	0.931	0.754	0.72	83
rs587784236	337	H/Y	0	0.989	0.884	29.4	0.994481	-1.49	0.160986	0.7242	0.75	3.39	-5.94	0.946	0.98655	0.22	Increase	-0.942328	0.949	0.729	0.752	53
rs587784236	135	H/D	0	0.988	0.882	29.7	0.992661	-1.47	0.216536	0.6971	0.774	2.635	-8.91	0.965	0.99041		Decrease
rs587784236	135	H/Y	0	0.982	0.871	29.4	0.994481	-1.49	0.160986	0.7242	0.75	3.39	-5.94	0.946	0.98655		Decrease
rs587784239	355	S/N	0	0.678	0.686	27.1	0.996394	-0.68	0.103093	0.632	0.805	4.245	-2.9	0.497	0.96835	-0.61	Decrease	-0.627715	0.838	0.706	0.495	56
rs587784239	153	S/N	0	0.883	0.789	27.1	0.996394	-0.68	0.103093	0.632	0.805	4.245	-2.9	0.497	0.96835		Decrease
rs587784242	379	H/Y	0.01	0.52	0.581	29.9	0.996947	-1.49	0.271597	0.6252	0.917	3.94	-5.94	0.925	0.99548	0.29	Increase	-0.871918	0.915	0.292	0.429	34
rs587784242	177	H/Y	0.01	0.307	0.501	29.9	0.996947	-1.49	0.271597	0.6252	0.917	3.94	-5.94	0.925	0.99548		Decrease
rs587784244	387	D/Y	0.02	0.408	0.515	31	0.981075	0.1	-	0.2452	0.682	2.05	-6.01	0.961	0.99758	0.34	Decrease	-0.831689	0.633	0.462	0.295	16
rs587784244	185	D/Y	0.03	0.967	0.773	31	0.981075	0.1	-	0.2452	0.682	2.05	-6.01	0.961	0.99758		Decrease
rs587784245	389	H/Y	0.22	0.993	0.492	23.7	0.984223	0.1	0.021531	0.4017	0.89	2.255	-4.32	0.981	0.99743	0.45	Increase	-1.13512	0.639	0.49	0.433	34
rs587784245	187	H/Y	0.12	0.317	0.36	23.7	0.984223	0.1	0.021531	0.4017	0.89	2.255	-4.32	0.981	0.99743		Decrease
rs754775447	394	Y/C	0.14	0.985	0.681	23.5	0.994411	0.02	0.0213632	0.2897	0.631	0.975	-5.38	0.826	0.99498	-1.06	Decrease	-0.64218	0.604	0.487	0.271	-17
rs754775447	192	Y/C	0.13	0.729	0.518	23.5	0.994411	0.02	0.0213632	0.2897	0.631	0.975	-5.38	0.826	0.99498		Increase
rs1131691295	397	T/I	0	0.991	0.889	27.3	0.998223	-0.27	0.122061	0.6441	0.763	3.04	-5.33	0.949	0.99547	-0.03	Increase	0.252698				77
rs1131691295	195	T/I	0	0.945	0.834	27.3	0.998223	-0.27	0.122061	0.6441	0.763	3.04	-5.33	0.949	0.99547		Decrease
rs587784247	398	G/D	0	0.997	0.911	26.6	0.997253	-0.63	0.107279	0.6703	0.896	3.98	-6.18	0.982	0.99713	-0.84	Decrease	-0.904714	0.84	0.331	0.475	74
rs587784247	196	G/D	0	0.978	0.865	26.6	0.997253	-0.63	0.107279	0.6703	0.896	3.98	-6.18	0.982	0.99713		Increase
rs587784248	399	S/T	0.01	0.845	0.73	25.4	0.990653	-0.83	0.0645728	0.6373	0.853	4.035	-2.86	0.843	0.99767	0.02	Increase	-0.393712	0.565	0.233	0.111	-9
rs587784248	197	S/T	0.01	0.584	0.607	25.4	0.990653	-0.83	0.0645728	0.6373	0.853	4.035	-2.86	0.843	0.99767	-0.37	Increase	-0.918907	0.655	0.425	0.356	-48
rs587784249	401	D/H	0	0.997	0.911	26.5	0.994879	-2.51	0.427471	0.9151	0.858	4.495	-6.69	0.976	0.99631	-0.53	Decrease	-0.943537	0.866	0.615	0.444	84
rs587784249	199	D/H	0	0.979	0.867	26.5	0.994879	-2.51	0.427471	0.9151	0.858	4.495	-6.69	0.976	0.99631		Decrease
rs200258896	6	R/G	0	0.649	0.672	25.9	0.936894	-1.77	0.271386	0.6113	0.423	3.35	-5.95	0.611	0.85263	-1.39	Decrease	-1.61632	0.535	0.67	0.498	60
rs372974127	8	R/Q	0.23	0.07	0.046	22.9	0.978424	-1.67	0.0718322	0.3758	-	1.95	-1.9	0.295	0.9297	-0.96	Decrease	-0.984999	0.223	0.256	0.127	-74
rs139434124	85	L/F	0.04	0.061	0.353	21	0.994533	0.48	0.0148982	0.1243	-	1.32	-0.78	0.147	0.89315	-0.91	Decrease	-0.375005	0.209	0.254	0.055	-35
rs1555526698	141	D/N	0	0.188	0.462	25.5	0.998965	-1.43	0.0674213	0.3097	0.414	0.23	-3.54	0.078	0.99533	-0.41	Decrease	-0.663453	0.28	0.29	0.095	-18
rs201201710	151	D/G	0.02	0.662	0.617	22.3	0.997763	0.31	0.0288674	0.1483	0.423	0.33	-4.58	0.883	0.99108	-1.22	Decrease	-0.876974	0.297	0.393	0.1	-41
rs377583144	203	N/S	1	0	0	10.18	0.362158	0.31	0.0239486	0.1427	-	-0.4	1.07	0.055	0.99801	-0.62	Increase	-0.872503	0.62	0.088	0.079	-96
rs377583144	203	N/I	0.01	0.103	0.414	23	0.983819	0.11	0.175862	0.2293	0.649	1.61	-3.58	0.775	0.99816	0.42	Increase	-0.321015	0.836	0.463	0.491	-41
rs377583144	35	N/S	1	0.001	0	10.18	0.362158	0.31	0.0239486	0.1427	-	-0.4	1.07	0.055	0.99801		Decrease
rs377583144	35	N/I	0.01	0.027	0.407	23	0.983819	0.11	0.175862	0.2293	0.649	1.61	-3.58	0.775	0.99816		Decrease
rs142842676	207	I/T	0.04	0.628	0.568	26.5	0.991168	-0.11	0.0790913	0.4379	-	2.775	-3.86	0.909	0.9971	-2.37	Decrease	-1.42749	0.747	0.495	0.42	-44
rs142842676	39	I/T	0.04	0.509	0.519	26.5	0.991168	-0.11	0.0790913	0.4379	-	2.775	-3.86	0.909	0.9971		Decrease
rs555806037	216	I/V	0.12	0.015	0.261	19.14	0.99575	0.05	0.0432692	0.1196	0.559	-0.015	-0.92	0.241	0.99781	-1.11	Decrease	-0.875393	0.157	0.231	0.066	-84
rs555806037	48	I/V	0.2	0.138	0.06	19.14	0.99575	0.05	0.0432692	0.1196	0.559	-0.015	-0.92	0.241	0.99781		Decrease
rs1567559660	228	K/N	0.03	0.229	0.388	25.7	0.997135	0.16	0.0318043	0.2569	0.583	1.625	-3.52	0.433	0.98881	-0.1	Increase	-0.202942	0.307	0.522	0.17	23
rs1567559660	60	K/N	0.01	0.497	0.572	25.7	0.997135	0.16	0.0318043	0.2569	0.583	1.625	-3.52	0.433	0.98881		Increase
rs140360173	252	C/S	0.13	0.407	0.384	24.5	0.955395	0.31	0.0225113	0.1945	-	0.225	-8.76	0.59	0.99408	-1.04	Decrease	-1.36961	0.412	0.21	0.147	-19
rs140360173	84	C/S	0.11	0.122	0.282	24.5	0.955395	0.31	0.0225113	0.1945	-	0.225	-8.76	0.59	0.99408		Decrease
rs201199675	264	A/S	1	0	0	14.15	0.990569	-1.4	0.0284908	0.2981	0.398	0.475	-0.61	0.719	0.9934	-0.72	Decrease	-0.468513	0.139	0.221	0.039	-98
rs201199675	96	A/S	1	0.007	0	14.15	0.990569	-1.4	0.0284908	0.2981	0.398	0.475	-0.61	0.719	0.9934		Decrease
rs138020781	264	A/G	0.19	0	0.05	22.9	0.99775	-1.46	0.0381573	0.4138	-	0.92	-2.18	0.764	0.98964	-1.17	Decrease	-1.26349	0.172	0.356	0.042	-81
rs138020781	96	A/G	0.18	0.001	0.056	22.9	0.99775	-1.46	0.0381573	0.4138	-	0.92	-2.18	0.764	0.98964		Decrease
rs141041867	288	S/R	0.06	0.696	0.572	24.1	0.994221	-1.51	0.0786244	0.4586	-	1.555	-2.6	0.724	0.95015	-0.18	Increase	-0.539153	0.266	0.394	0.147	-42
rs141041867	120	S/R	0.03	0.401	0.493	24.1	0.994221	-1.51	0.0786244	0.4586	-	1.555	-2.6	0.724	0.95015		Decrease
rs1555527149	300	E/G	0.12	0.014	0.261	23	0.997819	-1.46	0.0525249	0.2858	0.385	0.09	-1.29	0.799	0.99167	-1.2	Decrease	-1.57519	0.101	0.338	0.039	-49
rs1555527149	132	E/G	0.03	0.023	0.365	23	0.997819	-1.46	0.0525249	0.2858	0.385	0.09	-1.29	0.799	0.99167		Decrease
rs138622703	331	L/I	0.34	0.528	0.201	22.8	0.943578	0.07	0.0288886	0.1842	-	0.845	-1.22	0.49	0.98537	-0.95	Decrease	-0.257661				-80
rs748501310	3	L/M	0.01	0.973	0.821	27.3	0.955113	-2.72	0.314724	0.8752	0.457	3.525	-1.84	0.411	0.9422	-1.16	Decrease	-0.194686	0.23		0.109	-91
rs770331294	14	A/T	0	0.94	0.83	31	0.999146	-1.1	0.196871	0.6642	0.481	3.235	-2.72	0.659	0.98694	-0.83	Decrease	-1.71222	0.467	0.422	0.377	-33
rs759371674	17	D/N	0.04	0.872	0.688	26	0.999133	-1.39	0.0702778	0.6006	0.56	3.02	-4	0.08	0.98141	-0.95	Decrease	-0.970353				-59
rs771951756	24	Y/C	0.02	0.968	0.793	24.3	0.998286	-1.89	0.197328	0.7263	0.61	2.76	-6.01	0.871	0.9739	-1.28	Decrease	-0.763304	0.736	0.799	0.724	-9
rs746864477	46	K/R	0.07	0.632	0.54	23.5	0.998351	-1.71	0.066033	0.5978	0.46	2.535	-2.57	0.364	0.98797	-0.01	Decrease	-1.06428	0.497	0.347	0.307	48
rs768437076	47	Y/F	0.11	0	0.272	20.2	0.97363	-1.64	0.0497834	0.4091	0.514	1.41	-1.99	0.526	0.98804	0.21	Decrease	-0.0333657	0.424	0.215	0.141	33
rs757993270	55	W/L	0	0.949	0.838	32	0.986946	-3.54	0.462985	0.934	0.68	3.865	-12.62	0.615	0.9907	-0.74	Decrease	-0.0593453	0.72	0.745	0.654	72
rs756443284	95	I/V	0.2	0	0.049	16.45	0.9957	-1.41	0.0208555	0.423	0.363	2.04	-0.71	0.531	0.98847	-0.98	Decrease	-0.414583	0.059	0.211	0.04	-84
rs764855780	98	P/L	0.11	0.034	0.274	23.7	0.996221	-1.32	0.0565124	0.3675	0.527	2.54	-5.8	0.73	0.98259	-0.3	Increase	-0.14051	0.208	0.538	0.23	-61
rs772135892	112	T/S	0.06	0.922	0.694	23.1	0.996061	0.1	0.0284832	0.234	0.547	1.155	-3.31	0.764	0.9902	-0.73	Decrease	-0.973168	0.174	0.383	0.081	-24
rs772188120	138	E/D	0.05	0.184	0.362	24	0.997103	-1.49	0.0235242	0.3197	0.379	1.05	-2.87	0.595	0.96863	-0.68	Decrease	-1.1082	0.208	0.501	0.294	-27
rs753583241	159	D/N	0.16	0.822	0.37	26.4	0.999146	0.25	0.0418743	0.1642	0.566	-0.755	-4.98	0.267	0.99323	-1.1	Decrease	-1.36039	0.356	0.2	0.07	-48
rs759035644	172	M/I	0	0.035	0.447	24.4	0.99636	0.22	0.0461427	0.2332	0.427	1.415	-2.1	0.845	0.99323	-0.41	Decrease	-0.395558				17
rs759035644	4	M/I	0.01	0.542	0.589	24.4	0.99636	0.22	0.0461427	0.2332	0.427	1.415	-2.1	0.845	0.99323		Increase
rs752624395	180	Q/E	0.59	0.011	0.005	11.94	0.978049	-1.31	0.0205144	0.2197	0.344	0.185	-1.39	0.671	0.99053	-0.35	Increase	-0.792438				-93
rs752624395	12	Q/E	0.58	0.026	0.006	11.94	0.978049	-1.31	0.0205144	0.2197	0.344	0.185	-1.39	0.671	0.99053		Decrease
rs764058081	186	R/T	0	0.812	0.75	28.9	0.973968	0.27	0.0265208	0.3264	0.621	1.795	-3.6	0.879	0.99756	186	Decrease	-1.25568	0.541	0.509	0.368	45
rs764058081	18	R/T	0	0.8	0.746	28.9	0.973968	0.27	0.0265208	0.3264	0.621	1.795	-3.6	0.879	0.99756		Decrease
rs753701331	187	T/S	0.04	0.349	0.459	23.1	0.986781	0.09	0.0192987	0.318	0.571	0.98	-3.06	0.677	0.99786	-0.6	Decrease	-1.12485	0.397	0.269	0.137	-38
rs753701331	19	T/S	0.04	0.978	0.769	23.1	0.986781	0.09	0.0192987	0.318	0.571	0.98	-3.06	0.677	0.99786		Decrease
rs757106171	189	H/Y	1	0.519	0.174	13.34	0.657694	0.29	0.00863208	0.171	0.277	0.76	-2.42	0.771	0.99751	0.19	Increase	-0.557857	0.319	0.193	0.074	-77
rs757106171	21	H/Y	1	0.003	0	13.34	0.657694	0.29	0.00863208	0.171	0.277	0.76	-2.42	0.771	0.99751		Increase
rs747123825	201	M/I	0.6	0.203	0.024	18.77	0.804697	0.29	0.0454279	0.1155	0.614	0.24	-1.18	0.877	0.99866	-1.08	Decrease	-0.855269	0.562	0.102	0.137	-81
rs747123825	33	M/I	0.61	0.01	0.005	18.77	0.804697	0.29	0.0454279	0.1155	0.614	0.24	-1.18	0.877	0.99866		Decrease
rs770192064	215	T/S	0.1	0.246	0.311	22.3	0.995222	-0.22	0.0917115	0.2197	0.525	0.585	-3.39	0.799	0.99343	-0.58	Decrease	-1.11942	0.518	0.194	0.11	-61
rs770192064	47	T/S	0.07	0.087	0.326	22.3	0.995222	-0.22	0.0917115	0.2197	0.525	0.585	-3.39	0.799	0.99343		Decrease
rs746638515	248	L/V	0.05	0.214	0.366	20.1	0.997697	0.12	0.0137514	0.1777	0.407	1.31	-2.4	0.795	0.95985	-1.8	Decrease	-1.58936				-68
rs746638515	80	L/V	0.05	0.516	0.519	20.1	0.997697	0.12	0.0137514	0.1777	0.407	1.31	-2.4	0.795	0.95985		Decrease
rs768378326	250	A/V	0.64	0.838	0.323	23.2	0.999197	-0.2	0.0245743	0.2651	0.598	0.73	-3.28	0.884	0.98552	-0.28	Increase	-0.413665				-75
rs768378326	82	A/V	0.47	0.957	0.412	23.2	0.999197	-0.2	0.0245743	0.2651	0.598	0.73	-3.28	0.884	0.98552		Decrease
rs769869336	263	V/I	0.81	0	0.001	17.07	0.989516	-1.45	0.0181842	0.3445	0.311	0.655	-0.34	0.367	0.98475	-0.15	Decrease	-0.0708295	0.136	0.138	0.018	-94
rs769869336	95	V/I	0.81	0.006	0.001	17.07	0.989516	-1.45	0.0181842	0.3445	0.311	0.655	-0.34	0.367	0.98475		Decrease
rs751856745	267	E/K	0.05	0.114	0.354	25.3	0.998744	0.23	0.0216495	0.1602	0.483	0.73	-3.7	0.769	0.9926	-0.68	Decrease	-0.516241	0.203	0.213	0.039	-17
rs751856745	99	E/K	0.05	0.639	0.569	25.3	0.998744	0.23	0.0216495	0.1602	0.483	0.73	-3.7	0.769	0.9926		Decrease
rs767684662	269	K/R	0.1	0.03	0.288	20.8	0.998811	-0.05	0.0236677	0.1683	0.5	0.725	-2.35	0.653	0.99029	-0.06	Increase	0.0444043	0.095	0.186	0.018	-70
rs767684662	101	K/R	0.13	0.156	0.267	20.8	0.998811	-0.05	0.0236677	0.1683	0.5	0.725	-2.35	0.653	0.99029	-0.23	Decrease	-0.383993	0.079	0.138	0.022	-94
rs752776848	282	I/V	1	0.012	0.001	8.974	0.87738	0.32	0.00816996	0.0743	0.411	-0.64	-0.06	0.2	0.97746	-1.03	Decrease	-0.381506	0.021	0.123	0.014	-95
rs752776848	114	I/V	1	0.007	0	8.974	0.87738	0.32	0.00816996	0.0743	0.411	-0.64	-0.06	0.2	0.97746		Decrease
rs772930611	296	A/G	0.1	0.005	0.286	23	0.995553	-1.5	0.0578343	0.4837	0.312	0.58	-2.53	0.671	0.99088	-0.95	Decrease	-2.07802	0.182	0.357	0.065	-79
rs772930611	128	A/G	0.06	0.112	0.332	23	0.995553	-1.5	0.0578343	0.4837	0.312	0.58	-2.53	0.671	0.99088		Decrease
rs757738669	304	S/G	0.44	0.001	0.013	15.88	0.982645	-1.47	0.0312433	0.2599	0.377	0	0.14	0.418	0.97635	-0.98	Decrease	-1.40061	0.124	0.155	0.019	-36
rs758825045	312	L/M	0.04	0.849	0.675	27.9	0.995711	0.05	0.0531407	0.3529	0.648	1.665	-0.28	0.736	0.96447	-1.06	Decrease	-0.870288	0.329	0.336	0.041	-42
rs745785490	351	K/R	0.13	0.042	0.255	21.3	0.998682	0.19	0.0306159	0.1402	0.511	1.15	-2.48	0.3	0.97805	-0.41	Increase	-0.443216	0.211	0.185	0.052	-82
rs745785490	351	K/M	0	0.917	0.812	28	0.996498	0.11	0.121666	0.3934	0.611	2.435	-5.61	0.776	0.98131	0.02	Increase	-0.0746745	0.401	0.782	0.291	1
rs745785490	149	K/R	0.12	0.009	0.261	21.3	0.998682	0.19	0.0306159	0.1402	0.511	1.15	-2.48	0.3	0.97805		Decrease
rs745785490	149	K/M	0	0.59	0.648	28	0.996498	0.11	0.121666	0.3934	0.611	2.435	-5.61	0.776	0.98131		Increase
rs768778197	364	V/I	0.57	0.015	0.007	14.76	0.961518	0.24	0.0151681	0.0946	0.353	-0.065	-0.3	0.179	0.94776	-0.2	Decrease	-0.920775	0.111	0.128	0.017	-97
rs768778197	162	V/I	0.41	0.018	0.015	14.76	0.961518	0.24	0.0151681	0.0946	0.353	-0.065	-0.3	0.179	0.94776		Increase
rs747896060	368	K/R	0.34	0	0.023	18.83	0.988279	-1.44	0.0455831	0.2754	0.334	0.265	-0.96	0.591	0.99106	-0.18	Decrease	-0.732732	0.154	0.143	0.022	-89
rs747896060	166	K/R	0.35	0.02	0.022	18.83	0.988279	-1.44	0.0455831	0.2754	0.334	0.265	-0.96	0.591	0.99106		Decrease
rs761868887	369	N/K	0.35	0.098	0.028	19.9	0.973021	-1.44	0.058834	0.2852	0.47	0.115	-3.37	0.344	0.98333	-0.27	Decrease	-1.30773	0.415	0.347	0.167	-72
rs761868887	167	N/K	0.51	0.018	0.009	19.9	0.973021	-1.44	0.058834	0.2852	0.47	0.115	-3.37	0.344	0.98333		Increase
rs763573429	384	T/S	0.46	0.382	0.134	22.2	0.97594	0.1	0.0301238	0.1736	-	0.92	-2.06	0.683	0.99637	-0.56	Decrease		0.135	0.102	0.021
rs763573429	182	T/S	0.51	0.017	0.009	22.2	0.97594	0.1	0.0301238	0.1736	-	0.92	-2.06	0.683	0.99637		Decrease
rs757892852	391	T/M	0.08	0.525	0.477	23.2	0.996437	0.17	0.0213887	0.2728	-	1.63	-2.26	0.572	0.99743	-0.21	Increase	-0.087223				-2
rs757892852	189	T/M	0.08	0.024	0.301	23.2	0.996437	0.17	0.0213887	0.2728	-	1.63	-2.26	0.572	0.99743		Increase
rs751486460	392	A/T	0.18	0.143	0.069	20.4	0.982463	0.23	0.0129458	0.1575	0.627	0.505	-1.23	0.721	0.9983	-0.63	Decrease	-0.702967				-89
rs751486460	190	A/T	0.21	0.018	0.044	20.4	0.982463	0.23	0.0129458	0.1575	0.627	0.505	-1.23	0.721	0.9983		Decrease
rs779221879	9	D/N	0.03	0.245	0.39	24.6	0.987527	-1.08	0.0937866	0.3988	0.492	1.385	-2.59	0.066	0.95213	-0.73	Increase	-1.08311	0.346	0.299	0.188	8
rs774411293	15	I/V	0.18	0.061	0.06	17.42	0.994278	-1.43	0.0286473	0.352	0.673	1.98	-0.61	0.378	0.98563	-1.16	Decrease	-1.06704	0.205	0.218	0.076	-62
rs955541680	37	L/F	0.05	0.969	0.757	23.4	0.998733	-1.74	0.0926947	0.5552	0.353	1.355	-1.46	0.608	0.9159	-0.94	Decrease	-1.51016	0.39	0.382	0.188	-18
rs773195662	59	I/T	0	0.066	0.449	21.5	0.992845	-1.9	0.134978	0.5615	0.656	2.715	-4.12	0.89	0.9875	-1.52	Decrease	-1.95535	0.264	0.545	0.258	-72
rs779220451	134	V/L	0.17	0.022	0.06	22.2	0.995417	0.27	0.035051	0.1258	0.517	0.25	-1.39	0.729	0.99621	-0.4	Decrease	-0.72275	0.154	0.275	0.176	-88
rs897228864	148	G/E	0	1	0.945	32	0.998435	-0.42	0.209343	0.4904	0.827	2.395	-7.97	0.861	0.99323	-0.58	Decrease	-0.741187	0.865	0.835	0.724	69
rs773975872	169	S/C	0	0.999	0.935	29.2	0.993318	-0.77	0.196019	0.6532	0.917	2.72	-4.99	0.924	0.99053	-0.36	Decrease	-0.421227				55
rs773975872	1	S/C	0	1	0.945	29.2	0.993318	-0.77	0.196019	0.6532	0.917	2.72	-4.99	0.924	0.99053		Decrease
rs780076557	201	M/V	0.18	0.009	0.057	15.99	0.914556	0.32	0.0453122	0.0965	0.615	0.18	-1.7	0.855	0.99853	-1.38	Decrease	-1.21383	0.567	0.091	0.089	-65
rs780076557	33	M/V	0.21	0.01	0.044	15.99	0.914556	0.32	0.0453122	0.0965	0.615	0.18	-1.7	0.855	0.99853		Decrease
rs868052564	238	R/H	0.02	0.66	0.616	34	0.999545	0.05	0.0392748	0.291	0.683	1.445	-4.99	0.87	0.9926	-1.28	Decrease	-1.02356	0.476	0.813	0.512	34
rs868052564	70	R/H	0.01	0.539	0.588	34	0.999545	0.05	0.0392748	0.291	0.683	1.445	-4.99	0.87	0.9926		Decrease
rs906198937	241	R/W	0.18	0.934	0.436	24.6	0.999017	0.1	0.0554199	0.3375	0.758	2.355	-5.34	0.887	0.96367	-0.36	Decrease	-0.599349	0.778	0.786	0.509	11
rs906198937	73	R/W	0.19	0.905	0.409	24.6	0.999017	0.1	0.0554199	0.3375	0.758	2.355	-5.34	0.887	0.96367		Increase
rs778412717	297	T/P	0.03	0.236	0.388	22.8	0.995118	-1.45	0.0739184	0.4003	0.292	0.55	-1.47	0.792	0.99251	-0.52	Decrease	-1.65121				43
rs778412717	297	T/A	1	0	0	12.6	0.991772	-1.41	0.0274133	0.2653	0.321	-0.345	0.86	0.731	0.99167	-1.12	Decrease	-1.28218	0.391	0.345	0.149	-73
rs778412717	129	T/P	0	0.015	0.445	22.8	0.995118	-1.45	0.0739184	0.4003	0.292	0.55	-1.47	0.792	0.99251		Decrease
rs778412717	129	T/A	0.21	0.003	0.044	12.6	0.991772	-1.41	0.0274133	0.2653	0.321	-0.345	0.86	0.731	0.99167		Decrease
rs980416636	350	G/V	0	0.998	0.919	31	0.998197	-0.21	0.182634	0.5959	0.76	2.665	-8.9	0.965	0.99385	-0.67	Decrease	-1.70386	0.943	0.858	0.858	64
rs980416636	148	G/V	0	0.997	0.911	31	0.998197	-0.21	0.182634	0.5959	0.76	2.665	-8.9	0.965	0.99385	-0.44	Decrease	-0.737037	0.885	0.862	0.71	53
rs776901912	367	Y/S	0	0.447	0.591	23.3	0.96403	-1.46	0.113413	0.3366	0.686	0.195	-2.23	0.735	0.96839	-1.49	Decrease	-1.74789	0.369	0.16	0.068	11
rs776901912	165	Y/S	0	0.062	0.449	23.3	0.96403	-1.46	0.113413	0.3366	0.686	0.195	-2.23	0.735	0.96839		Decrease
rs910626467	371	R/Q	0.04	0.5	0.516	24.5	0.999469	0.26	0.0326847	0.1606	0.39	0.275	-3.96	0.717	0.99311	-0.99	Decrease	-0.71866	0.248	0.382	0.13	-59
rs910626467	169	R/Q	0.04	0.929	0.725	24.5	0.999469	0.26	0.0326847	0.1606	0.39	0.275	-3.96	0.717	0.99311		Increase
rs781058937	396	V/I	0.59	0.015	0.005	12.73	0.922225	0.13	0.00742202	0.1469	-	1.715	-0.38	0.3	0.99068	-0.36	Decrease	-0.428645	0.22	0.081	0.023	-77
rs781058937	194	V/I	0.52	0.012	0.009	12.73	0.922225	0.13	0.00742202	0.1469	-	1.715	-0.38	0.3	0.99068		Increase
rs984548299	24	Y/N	0	0.851	0.772	22.7	0.991146	-1.89	0.193737	0.6979	0.633	2.415	-6.34	0.854	0.9657	-1.71	Decrease	-1.09421	0.706	0.699	0.721	9
rs1197988240	48	A/T	0.28	0.003	0.032	22.2	0.978754	-1.64	0.0367997	0.3036	0.278	0.125	-1.29	0.689	0.9892	-0.49	Decrease	-0.977745				-93
rs1177684964	50	L/V	0.02	0.127	0.394	23.8	0.996839	-2.12	0.0957132	0.6445	0.365	2.92	-2.8	0.366	0.98071	-1.36	Decrease	-1.02542	0.374	0.362	0.242	-34
rs1010388307	74	E/A	0.75	0.02	0.003	13.29	0.967743	-1.59	0.037864	0.3706	0.36	1.48	-2.98	0.531	0.99188	-0.45	Decrease	-1.41593	0.124	0.156	0.039	-78
rs1020067108	80	T/M	0.1	0.206	0.306	23.1	0.996253	-2.08	0.0264946	0.1064	0.313	0.55	0.07	0.471	0.94311	-0.26	Increase	-0.329659	0.153	0.429	0.079	-25
rs1183035372	85	L/H	0.09	0.117	0.306	16.12	0.926782	0.48	0.0357716	0.1194	0.197	1.32	-0.32	0.346	0.97991	-1.81	Decrease	-1.02208	0.391	0.283	0.099	-31
rs1160093635	103	A/S	0.38	0.003	0.018	16.42	0.956333	0.28	0.0160194	0.1038	0.502	-0.615	-0.18	0.594	0.97999	-0.65	Decrease	-0.867453	0.123	0.166	0.043	-84
rs1210768389	105	S/R	0.08	0.773	0.587	23.9	0.997773	0.26	0.0374242	0.1773	0.354	0.155	-2.74	0.781	0.99112	-0.15	Increase	-0.343448	0.131	0.192	0.035	-87
rs1174082142	150	T/I	0.02	0.971	0.796	32	0.999173	-0.14	0.0760454	0.436	0.481	2.76	-5.7	0.824	0.98672	-0.28	Increase	-0.147587	0.391	0.702	0.381	19
rs997298510	184	C/Y	0.07	0.991	0.763	25.1	0.99408	-0.03	0.0279775	0.4148	0.504	1.52	-7.93	0.947	0.99855	-0.01	Increase	-0.777746	0.814	0.687	0.646	15
rs997298510	16	C/Y	0.64	0.984	0.433	25.1	0.99408	-0.03	0.0279775	0.4148	0.504	1.52	-7.93	0.947	0.99855		Decrease
rs1030536153	189	H/P	0.32	0.609	0.235	14.47	0.926718	0.25	0.019918	0.1682	0.346	0.32	-3.75	0.87	0.99707	0.17	Increase	-1.10303	0.575	0.144	0.16	-27
rs1030536153	21	H/P	0.36	0.308	0.116	14.47	0.926718	0.25	0.019918	0.1682	0.346	0.32	-3.75	0.87	0.99707		Increase
rs1217691247	209	S/T	0.01	0.688	0.651	24.4	0.989066	-0.14	0.081141	0.3408	0.812	1.295	-2.99	0.752	0.99722	-0.32	Decrease	-0.350549	0.516	0.57	0.298	-28
rs1217691247	41	S/T	0.03	0.716	0.623	24.4	0.989066	-0.14	0.081141	0.3408	0.812	1.295	-2.99	0.752	0.99722		Decrease
rs1198271089	257	T/A	0.08	0.789	0.596	22	0.997916	-0.4	0.0571519	0.3655	0.648	1.74	-4.1	0.913	0.99029	-1.37	Decrease	-1.22311	0.669	0.26	0.135	4
rs1198271089	89	T/A	0.07	0.824	0.631	22	0.997916	-0.4	0.0571519	0.3655	0.648	1.74	-4.1	0.913	0.99029		Decrease
rs1210438471	298	G/R	0.02	0.455	0.532	24.6	0.997408	-1.6	0.0932089	0.6379	0.378	1.175	-5.4	0.774	0.98751	-0.55	Decrease	-0.400218	0.419	0.764	0.517	42
rs1210438471	130	G/R	0	0.68	0.687	24.6	0.997408	-1.6	0.0932089	0.6379	0.378	1.175	-5.4	0.774	0.98751		Decrease
rs1194042667	329	M/I	0.24	0	0.037	23	0.979006	0.25	0.0123978	0.1135	0.41	-0.29	-0.57	0.353	0.98112	-0.46	Decrease	-0.406368	0.532	0.23	0.193	-84
rs1160436108	342	R/C	0	0.999	0.935	35	0.999267	0.06	0.0803012	0.3882	0.417	0.69	-7.75	0.968	0.97031	-1.03	Decrease	-0.522543	0.821	0.921	0.715	45
rs1160436108	140	R/C	0	0.994	0.897	35	0.999267	0.06	0.0803012	0.3882	0.417	0.69	-7.75	0.968	0.97031		Decrease
rs1167470350	377	N/S	0.21	0	0.044	18.27	0.989934	0.29	0.00816297	0.1004	0.331	-0.43	-0.43	0.05	0.9488	-0.25	Decrease	-0.781749	0.172	0.107	0.024	-85
rs1167470350	175	N/S	0.21	0.001	0.044	18.27	0.989934	0.29	0.00816297	0.1004	0.331	-0.43	-0.43	0.05	0.9488		Decrease
rs1021693420	393	P/S	0.04	0.98	0.773	22.9	0.99829	0.16	0.0115411	0.2189	0.521	-0.385	-4.65	0.743	0.99743	-1.7	Decrease	-0.781749	0.146	0.242	0.058	-77
rs1021693420	191	P/S	0.04	0.73	0.615	22.9	0.99829	0.16	0.0115411	0.2189	0.521	-0.385	-4.65	0.743	0.99743		Decrease
rs1252829293	14	A/G	0.04	0.167	0.364	25.2	0.997904	-1.1	0.0687267	0.4312	0.552	2.43	-2.99	0.658	0.9827	-1.4	Decrease	-2.42414	0.385	0.461	0.3	2
rs1266351305	49	G/D	0.02	0.961	0.787	28.1	0.997588	-1.68	0.22395	0.7792	0.488	2.815	-6.34	0.776	0.9892	-1.13	Decrease	-1.38261	0.719	0.484	0.661	30
rs1230408042	122	V/L	0.5	0.01	0.011	13.41	0.984771	0.34	0.0113896	0.0548	0.438	-0.79	-0.64	0.856	0.99355	-0.89	Decrease	-1.14118	0.139	0.1	0.037	-80
rs1334642659	123	M/T	0	0.637	0.667	24.7	0.993828	0.2	0.0649852	0.3336	0.749	2.195	-3.2	0.842	0.98397	-1.05	Decrease	-0.978979	0.503	0.53	0.487	3
rs1259396933	134	V/A	0	0.834	0.762	26.5	0.99874	-0.2	0.11337	0.4067	0.67	2.27	-3.48	0.874	0.99136	-1.12	Decrease	-1.78185	0.437	0.484	0.277	20
rs1226589466	141	D/G	0	0.829	0.759	28.8	0.998685	-1.46	0.114186	0.482	0.455	0.78	-5.53	0.871	0.99442	-0.7	Decrease	-1.1199	0.334	0.402	0.14	13
rs1308101130	166	A/V	0.52	0.274	0.038	23.3	0.997757	-0.2	0.0287268	0.2581	0.665	1.35	-1.15	0.758	0.98672	0	Increase	-0.293795	0.538	0.157	0.099	-65
rs1285642396	172	M/V	0	0.139	0.457	23	0.991943	0.22	0.0510385	0.1881	0.353	1.07	-2.57	0.794	0.99108	-0.73	Decrease	-1.07265				22
rs1285642396	4	M/V	0.02	0.437	0.525	23	0.991943	0.22	0.0510385	0.1881	0.353	1.07	-2.57	0.794	0.99108		Increase
rs1297179070	218	M/I	1	0.03	0.002	16.85	0.701305	0.65	0.0607797	0.0492	0.453	-1.77	-1.23	0.896	0.9981	-0.49	Decrease		0.156	0.1	0.028	-96
rs1297179070	50	M/I	1	0.001	0	16.85	0.701305	0.65	0.0607797	0.0492	0.453	-1.77	-1.23	0.896	0.9981		Decrease
rs1262666760	221	V/M	0.02	0.593	0.588	24.8	0.995621	-1.61	0.249065	0.6155	0.372	1.375	-2.39	0.71	0.99802	-0.82	Decrease	-0.934373	0.425	0.57	0.144	-30
rs1262666760	53	V/M	0.02	0.5	0.55	24.8	0.995621	-1.61	0.249065	0.6155	0.372	1.375	-2.39	0.71	0.99802		Increase
rs1309916378	226	C/S	0	0.999	0.935	27.4	0.992221	0.02	0.12997	0.3758	0.721	1.49	-8.94	0.893	0.98674	-0.51	Decrease	-1.14767	0.522	0.716	0.451	34
rs1309916378	58	C/S	0	0.995	0.902	27.4	0.992221	0.02	0.12997	0.3758	0.721	1.49	-8.94	0.893	0.98674		Decrease
rs1275216248	285	A/P	0	0.996	0.906	31	0.998109	0.03	0.0628679	0.4571	0.682	2	-4.74	0.933	0.99466	-0.03	Increase	-1.31521	0.605	0.689	0.624	57
rs1275216248	117	A/P	0.02	0.851	0.71	31	0.998109	0.03	0.0628679	0.4571	0.682	2	-4.74	0.933	0.99466		Increase
rs1361236733	290	Y/C	0.01	0.561	0.597	19.71	0.998094	-1.51	0.0728636	0.4795	0.431	1.445	-3.17	0.617	0.96007	-0.79	Decrease	-1.13211	0.464	0.657	0.374	19
rs1361236733	122	Y/C	0.01	0.006	0.406	19.71	0.998094	-1.51	0.0728636	0.4795	0.431	1.445	-3.17	0.617	0.96007		Decrease
rs1327563467	302	K/Q	0.15	0.717	0.5	15.69	0.986895	-1.45	0.0738533	0.3068	0.448	0.425	-1.29	0.544	0.99743	-0.59	Decrease	-0.88172	0.144	0.226	0.052	10
rs1327563467	302	K/E	0.32	0.438	0.167	15.08	0.981468	-1.44	0.0593697	0.2587	0.417	0.425	-0.93	0.676	0.99714	-0.34	Decrease	-0.614458	0.277	0.179	0.108	24
rs1248372404	311	L/V	0.58	0.387	0.129	14.99	0.983145	-0.28	0.042752	0.2357	0.664	1.1	-1.76	0.776	0.95756	-1.19	Decrease	-1.09781	0.369	0.218	0.057	-87
rs1345313290	351	K/E	0	0.568	0.639	24.8	0.998373	0.18	0.0464448	0.2649	0.554	1.44	-3.7	0.843	0.98501	-0.38	Increase	-0.255237	0.574	0.498	0.474	25
rs1345313290	149	K/E	0	0.415	0.579	24.8	0.998373	0.18	0.0464448	0.2649	0.554	1.44	-3.7	0.843	0.98501		Increase
rs1272529010	361	T/S	0.18	0.047	0.059	18.56	0.985191	-0.22	0.0362204	0.2462	0.71	1.505	-3.84	0.756	0.9864	-1.04	Decrease	-1.15075	0.549	0.544	0.346	-74
rs1272529010	159	T/S	0.16	0.153	0.073	18.56	0.985191	-0.22	0.0362204	0.2462	0.71	1.505	-3.84	0.756	0.9864		Decrease
rs1268498334	372	C/Y	0	0.888	0.792	29.4	0.996999	-0.03	0.0988071	0.4472	0.758	2.73	-9.83	0.953	0.99311	-0.26	Decrease	-1.49492	0.817	0.487	0.465	33
rs1268498334	170	C/Y	0	0.94	0.83	29.4	0.996999	-0.03	0.0988071	0.4472	0.758	2.73	-9.83	0.953	0.99311		Decrease
rs1320896171	378	A/V	0.03	0.936	0.746	35	0.999281	0.02	0.0787616	0.4878	0.787	2.955	-3.96	0.71	0.99548	-0.18	Increase	-0.381311	0.501	0.357	0.243	-17
rs1320896171	176	A/V	0.03	0.97	0.777	35	0.999281	0.02	0.0787616	0.4878	0.787	2.955	-3.96	0.71	0.99548		Decrease
rs1308269662	380	E/Q	0.44	0.006	0.013	19.18	0.997278	0.01	0.0173251	0.2113	0.401	0.755	-0.62	0.645	0.99771	-0.6	Decrease	-0.856799	0.18	0.186	0.032	-88
rs1308269662	178	E/Q	0.49	0.007	0.011	19.18	0.997278	0.01	0.0173251	0.2113	0.401	0.755	-0.62	0.645	0.99771		Decrease
rs1233281843	383	V/L	0.04	0.463	0.501	24.6	0.996774	-0.74	0.0976373	0.5573	0.689	2.565	-1.99	0.895	0.99771	-0.8	Decrease	-0.0869527	0.755	0.241	0.269	59
rs1233281843	181	V/L	0.03	0.248	0.39	24.6	0.996774	-0.74	0.0976373	0.5573	0.689	2.565	-1.99	0.895	0.99771		Increase
rs1292467643	410	R/C	0	0.999	0.935	34	0.999178	-0.13	0.103251	0.6199	0.419	3.7	-5.82	0.715	0.99163	-0.77	Decrease	0.142109	0.298	0.728	0.298	38
rs1292467643	208	R/C	0	0.998	0.919	34	0.999178	-0.13	0.103251	0.6199	0.419	3.7	-5.82	0.715	0.99163		Decrease
rs1454875471	39	V/A	0.25	0.021	0.038	14.49	0.989547	-1.62	0.0632885	0.3806	0.367	0.345	-0.46	0.192	0.98764	-1.06	Decrease	-1.19345	0.166	0.161	0.043	-34
rs1370319961	78	E/Q	0	0.634	0.666	23.5	0.993655	-2.39	0.0794721	0.3068	0.292	2.825	-2.86	0.639	0.99387	-0.33	Decrease	-1.10438	0.241	0.461	0.245	-23
rs1389070949	115	I/V	0.16	0.011	0.06	17.17	0.994619	0.29	0.00919385	0.0973	0.464	-0.47	-0.16	0.429	0.99016	-0.84	Decrease	-0.843987	0.135	0.141	0.025	-86
rs1451577273	118	P/S	0.02	1	0.883	28.3	0.999263	-0.48	0.128204	0.5067	0.725	2.05	-7.95	0.757	0.985	-1.45	Decrease	-1.03142	0.813	0.219	0.216	12
rs1411169520	166	A/T	0	0.979	0.867	26.9	0.997418	-0.47	0.109217	0.6134	0.709	2.705	-2.53	0.506	0.98466	-0.63	Decrease	-1.03142	0.811	0.42	0.392	30
rs1478372648	188	M/T	0.02	0.399	0.512	23.2	0.981946	0.26	0.038698	0.266	0.795	1.7	-3.72	0.856	0.9975	-1.32	Decrease		0.507	0.505	0.449	58
rs1478372648	20	M/T	0.03	0.608	0.575	23.2	0.981946	0.26	0.038698	0.266	0.795	1.7	-3.72	0.856	0.9975		Decrease
rs1395194347	279	V/A	0	0.989	0.884	27.1	0.99796	-0.78	0.140404	0.6032	0.667	2.375	-3.94	0.89	0.9867	-0.78	Decrease	-1.03142	0.581	0.393	0.24	36
rs1395194347	111	V/A	0	0.976	0.863	27.1	0.99796	-0.78	0.140404	0.6032	0.667	2.375	-3.94	0.89	0.9867	-2.21	Decrease	-1.1949	0.675	0.472	0.314	52
rs1388077142	319	T/I	0.02	0.536	0.564	25.6	0.998129	-0.39	0.0906224	0.3361	0.671	2.15	-3.58	0.882	0.98663	-0.41	Decrease	-0.508207	0.879	0.501	0.379	37
rs1402375075	322	M/V	0.23	0.001	0.042	15.84	0.938533	0.64	0.0176732	0.0559	0.44	-0.87	0.66	0.87	0.98537	-0.98	Decrease	-1.06427	0.309	0.132	0.062	-75
rs1405984785	327	T/I	0.13	0.001	0.253	22.7	0.99031	-1.7	0.0274585	0.469	0.476	1.565	-3.35	0.347	0.91374	-0.08	Increase	0.346439	0.851	0.134	0.194	-20
rs1408387783	329	M/T	0.71	0.024	0.003	15.23	0.909632	0.34	0.0132859	0.063	0.336	-1.275	-1.09	0.675	0.99169	-0.82	Decrease	-1.35557				-92
rs1451784292	332	M/T	0.39	0.37	0.134	18.3	0.937605	0.38	0.0333634	0.0882	0.541	-0.1	-1.71	0.801	0.99169	-0.83	Decrease	-1.67459	0.527	0.168	0.155	-69
rs1452249667	333	T/I	0.03	0.582	0.565	25.3	0.998441	0.13	0.0714449	0.2072	0.566	2.075	-4.73	0.794	0.99198	-0.37	Decrease	-0.0881045				26
rs1411254406	345	L/V	1	0.001	0	13.65	0.829595	0.25	0.0150611	0.0982	0.498	-0.585	0.81	0.615	0.97755	-1.42	Decrease	-1.04045	0.356	0.107	0.031	-87
rs1411254406	143	L/V	1	0	0	13.65	0.829595	0.25	0.0150611	0.0982	0.498	-0.585	0.81	0.615	0.97755		Decrease
rs1480224569	349	G/E	0.05	0.854	0.674	23.5	0.995854	-1.46	0.085421	0.4359	0.471	-0.325	-3.5	0.83	0.99311	-0.77	Decrease	-0.856173	0.803	0.358	0.452	-37
rs1480224569	147	G/E	0.04	0.36	0.463	23.5	0.995854	-1.46	0.085421	0.4359	0.471	-0.325	-3.5	0.83	0.99311		Increase
rs1484185583	361	T/S	0.18	0.047	0.059	22	0.988226	-0.22	0.0289447	0.2629	0.71	1.505	-3.84	0.756	0.99041	-1.04	Decrease	-1.15075				-74
rs1484185583	159	T/S	0.16	0.153	0.073	22	0.988226	-0.22	0.0289447	0.2629	0.71	1.505	-3.84	0.756	0.99041		Decrease
rs1480306161	366	D/E	0.16	0.042	0.062	21.6	0.990707	-0.32	0.0350993	0.2013	0.598	1.905	-1.79	0.921	0.95944	-0.41	Decrease	-0.935975	0.708	0.249	0.189	-36
rs1480306161	164	D/E	0.17	0.299	0.151	21.6	0.990707	-0.32	0.0350993	0.2013	0.598	1.905	-1.79	0.921	0.95944		Decrease
rs1478297734	372	C/S	0	0.609	0.655	24.1	0.994036	0.02	0.066418	0.363	0.79	1.965	-8.75	0.913	0.98767	-0.89	Decrease	-2.18471	0.638	0.354	0.279	16
rs1478297734	170	C/S	0	0.248	0.47	24.1	0.994036	0.02	0.066418	0.363	0.79	1.965	-8.75	0.913	0.98767		Decrease
rs1436423271	406	V/M	0.04	0.983	0.778	24.3	0.998675	-0.18	0.0498432	0.3761	0.529	1.515	-2.53	0.866	0.99538	-0.82	Decrease	-0.456755	0.164	0.531	0.116	-42
rs1436423271	204	V/M	0.05	0.935	0.726	24.3	0.998675	-0.18	0.0498432	0.3761	0.529	1.515	-2.53	0.866	0.99538		Decrease
rs1377109322	410	R/H	0	0.999	0.935	32	0.999306	-0.11	0.0525377	0.5588	0.418	3.495	-3.61	0.601	0.99538	-1.15	Decrease	-0.465321	0.12	0.398	0.08	37
rs1377109322	208	R/H	0	0.994	0.897	32	0.999306	-0.11	0.0525377	0.5588	0.418	3.495	-3.61	0.601	0.99538		Decrease
